# Supplementary material
Source: PubMed Central journal article supplement (PMC7586123)
Supplement: 12863_2020_908_MOESM2_ESM.pdf [file 12863_2020_908_MOESM2_ESM.pdf]

## ADDITIONAL FILE 2: POSITIVE SELECTION IN ADMIXED POPULATIONS FROM ETHIOPIA

Sandra Walsh, Luca Pagani, Yali Xue, Hafid Laayouni, Chris Tyler-Smith,  
Jaume Bertranpetit

| Percentile  | SFselect           |                    | Mean iHS per window |                   | -log <sub>10</sub> (p) iHS SNP based |                      |
|-------------|--------------------|--------------------|---------------------|-------------------|--------------------------------------|----------------------|
|             | 99.99              | 99.90              | 99.99               | 99.90             | 99.99                                | 99.90                |
| Afroasiatic | 2.31<br>(n= 20424) | 1.93<br>(n= 20424) | 2.53<br>(n=15809)   | 1.95<br>(n=15809) | 3.62<br>(n=738269)                   | 2.77<br>(n=738269)   |
| Gumuz       | 2.24<br>(n= 24000) | 1.56<br>(n= 24000) | 2.54<br>(n=19240)   | 2.05<br>(n=19240) | 3.88<br>(n=1055794)                  | 2.98<br>(n= 1055794) |

**Supplementary Table 1:** The 99.99<sup>th</sup> and 99.90<sup>th</sup> percentile thresholds of SFselect and iHS calculated after the neutral simulations. For SFselect and mean iHS we report in parenthesis the number of 30 kb simulated windows and for the SNP based iHS the number of SNPs used to calculate the thresholds.

| Chr     | Start     | Stop      | SFselect | Genes                                              |
|---------|-----------|-----------|----------|----------------------------------------------------|
| chr2    | 232673695 | 232703695 | 4.89     | <i>COPS7B</i>                                      |
| chr11   | 71898574  | 71928574  | 4.77     | <i>FOLR1, FOLR2</i>                                |
| chr1    | 147396808 | 147426808 | 4.58     | <i>GPR89B</i>                                      |
| chr11   | 71948574  | 71978574  | 4.50     | <i>INPPL1, PHOX2A</i>                              |
| chr11   | 71923574  | 71953574  | 4.48     | <i>FOLR2, INPPL1, PHOX2A</i>                       |
| * chr9  | 21215910  | 21245910  | 3.93     | <i>IFNA16, IFNA17, IFNA14</i>                      |
| chr1    | 226096808 | 226126808 | 3.85     | <i>LEFTY1, RP4-559A3.7, PYCR2, LEFTY2</i>          |
| chr5    | 81280629  | 81310629  | 3.84     | <i>ATG10</i>                                       |
| chr15   | 32754330  | 32784330  | 3.63     | <i>AC135983.2</i>                                  |
| chr7    | 72433619  | 72463619  | 3.50     | <i>TRIM74, AC005488.1</i>                          |
| chr1    | 149821808 | 149851808 | 3.36     | <i>HIST2H2AA4, HIST2H3A, HIST2H4B</i>              |
| chr17   | 30351088  | 30381088  | 3.35     | <i>LRRC37B</i>                                     |
| chr10   | 18164034  | 18194034  | 3.26     | <i>MRC1</i>                                        |
| chr5    | 140705629 | 140735629 | 3.22     | <i>PCDHGA1, PCDHGA2, PCDHGA3, PCDHGB1, PCDHGA4</i> |
| chr8    | 48786376  | 48816376  | 3.09     | <i>PRKDC</i>                                       |
| chr2    | 155023695 | 155053695 | 3.06     | <i>GALNT13</i>                                     |
| chr3    | 130698294 | 130728294 | 3.04     | <i>ATP2C1</i>                                      |
| chr17   | 43676088  | 43706088  | 3.01     | <i>CRHR1</i>                                       |
| chr3    | 93598294  | 93628294  | 3.01     | <i>PROS1</i>                                       |
| * chr10 | 51214034  | 51244034  | 3.01     | <i>AGAP8</i>                                       |
| chr10   | 51189034  | 51219034  | 2.97     | <i>FAM21D</i>                                      |
| chr17   | 15526088  | 15556088  | 2.96     | <i>RP11-385D13.1, TRIM16</i>                       |
| chr7    | 74158619  | 74188619  | 2.96     | <i>GTF2I, NCF1</i>                                 |
| chr17   | 30326088  | 30356088  | 2.88     | <i>SUZ12, LRRC37B</i>                              |
| chr17   | 47876088  | 47906088  | 2.82     | <i>KAT7</i>                                        |
| * chr12 | 112399817 | 112429817 | 2.78     | <i>TMEM116</i>                                     |
| chr3    | 93773294  | 93803294  | 2.71     | <i>ARL13B, DHFRL1, NSUN3</i>                       |
| * chr12 | 112374817 | 112404817 | 2.69     | <i>TMEM116</i>                                     |
| chr2    | 200773695 | 200803695 | 2.67     | <i>C2orf69, TYW5</i>                               |
| chr3    | 93798294  | 93828294  | 2.66     | <i>NSUN3</i>                                       |

**Supplementary Table 2A:** SFselect positive selection signals found in Amhara population. All the 30 kb window scores reported are above the 99.99 percentile threshold calculated after the simulations. Only protein coding genes are reported.

\* : Population-specific positive selection signals. These signals are above the 99.99 percentile threshold calculated after the simulations that are not found among the 99 percentile of the rest of the populations of study.

| Chr     | Start     | Stop      | SFselect | Genes                                                                 |
|---------|-----------|-----------|----------|-----------------------------------------------------------------------|
| chr11   | 71923574  | 71953574  | 4.75     | <i>FOLR2, INPPL1, PHOX2A</i>                                          |
| chr17   | 15526088  | 15556088  | 4.39     | <i>RP11-385D13.1, TRIM16</i>                                          |
| chr10   | 46339034  | 46369034  | 4.39     | <i>AGAP4</i>                                                          |
| chr11   | 71948574  | 71978574  | 4.26     | <i>INPPL1, PHOX2A</i>                                                 |
| chr1    | 226096808 | 226126808 | 4.12     | <i>LEFTY1, RP4-559A3.7, PYCR2, LEFTY2</i>                             |
| chr10   | 46489034  | 46519034  | 3.95     | <i>PTPN20A</i>                                                        |
| chr2    | 232673695 | 232703695 | 3.83     | <i>COPS7B</i>                                                         |
| chr1    | 78321808  | 78351808  | 3.72     | <i>FAM73A</i>                                                         |
| chr1    | 147396808 | 147426808 | 3.67     | <i>GPR89B</i>                                                         |
| chr13   | 114717755 | 114747755 | 3.62     | <i>RASA3</i>                                                          |
| chr2    | 155023695 | 155053695 | 3.56     | <i>GALNT13</i>                                                        |
| chr2    | 113198695 | 113228695 | 3.41     | <i>RGPD8</i>                                                          |
| chr1    | 149796808 | 149826808 | 3.38     | <i>HIST2H4A, HIST2H3C, HIST2H2AA3, HIST2H2AA4, HIST2H3A, HIST2H4B</i> |
| chr1    | 27096808  | 27126808  | 3.37     | <i>ARID1A, PIGV</i>                                                   |
| chr7    | 74158619  | 74188619  | 3.26     | <i>GTF2I, NCF1</i>                                                    |
| chr17   | 30351088  | 30381088  | 3.25     | <i>LRRC37B</i>                                                        |
| chr5    | 45505629  | 45535629  | 3.21     | <i>HCN1</i>                                                           |
| chr15   | 30829330  | 30859330  | 3.14     | <i>GOLGA8Q</i>                                                        |
| chr5    | 81280629  | 81310629  | 3.10     | <i>ATG10</i>                                                          |
| chr3    | 93698294  | 93728294  | 3.04     | <i>ARL13B</i>                                                         |
| chr11   | 71898574  | 71928574  | 3.02     | <i>FOLR1, FOLR2</i>                                                   |
| chr15   | 74954330  | 74984330  | 2.95     | <i>EDC3</i>                                                           |
| chr16   | 22021755  | 22051755  | 2.88     | <i>C16orf52</i>                                                       |
| chr14   | 36169850  | 36199850  | 2.76     | <i>RALGAPA1</i>                                                       |
| chr15   | 32754330  | 32784330  | 2.76     | <i>AC135983.2</i>                                                     |
| chr2    | 144973695 | 145003695 | 2.74     | <i>GTDC1</i>                                                          |
| * chr20 | 32178005  | 32208005  | 2.67     | <i>CBFA2T2</i>                                                        |
| chr11   | 66898574  | 66928574  | 2.63     | <i>KDM2A</i>                                                          |
| chr15   | 30704330  | 30734330  | 2.62     | <i>GOLGA8R</i>                                                        |
| chr5    | 36880629  | 36910629  | 2.62     | <i>NIPBL</i>                                                          |

**Supplementary Table 2B:** SFselect positive selection signals found in Oromo population. All the 30 kb window scores reported are above the 99.99 percentile threshold calculated after the simulations. Only protein coding genes are reported.

\* : Population-specific positive selection signals. These signals are above the 99.99 percentile threshold calculated after the simulations that are not found among the 99 percentile of the rest of the populations of study.

| Chr     | Start     | Stop      | SFselect | Genes                                     |
|---------|-----------|-----------|----------|-------------------------------------------|
| chr11   | 71923574  | 71953574  | 5.29     | <i>FOLR2, INPPL1, PHOX2A</i>              |
| chr13   | 53167755  | 53197755  | 4.30     | <i>HNRNPA1L2</i>                          |
| chr1    | 147396808 | 147426808 | 4.18     | <i>GPR89B</i>                             |
| chr1    | 78321808  | 78351808  | 4.10     | <i>FAM73A</i>                             |
| chr11   | 71948574  | 71978574  | 3.95     | <i>INPPL1, PHOX2A</i>                     |
| chr16   | 22021755  | 22051755  | 3.82     | <i>C16orf52</i>                           |
| chr10   | 18164034  | 18194034  | 3.64     | <i>MRC1</i>                               |
| chr2    | 232673695 | 232703695 | 3.48     | <i>COPS7B</i>                             |
| chr3    | 93798294  | 93828294  | 3.38     | <i>NSUN3</i>                              |
| chr1    | 146446808 | 146476808 | 3.34     | <i>NBPF12</i>                             |
| chr15   | 30829330  | 30859330  | 3.26     | <i>GOLGA8Q</i>                            |
| chr3    | 93598294  | 93628294  | 3.26     | <i>PROS1</i>                              |
| chr3    | 93773294  | 93803294  | 3.17     | <i>ARL13B, DHFRL1, NSUN3</i>              |
| chr1    | 149821808 | 149851808 | 3.08     | <i>HIST2H2AA4, HIST2H3A, HIST2H4B</i>     |
| chr1    | 226096808 | 226126808 | 3.01     | <i>LEFTY1, RP4-559A3.7, PYCR2, LEFTY2</i> |
| chr17   | 15526088  | 15556088  | 2.96     | <i>RP11-385D13.1, TRIM16</i>              |
| * chr16 | 22396755  | 22426755  | 2.93     | <i>CDR2</i>                               |
| chr13   | 114717755 | 114747755 | 2.91     | <i>RASA3</i>                              |
| chr7    | 72433619  | 72463619  | 2.91     | <i>TRIM74, AC005488.1</i>                 |
| chr5    | 81280629  | 81310629  | 2.89     | <i>ATG10</i>                              |
| chr2    | 113198695 | 113228695 | 2.88     | <i>RGPD8</i>                              |
| chr6    | 50655815  | 50685815  | 2.80     | <i>TFAP2D</i>                             |
| chr19   | 53032864  | 53062864  | 2.78     | <i>ZNF808, ZNF701</i>                     |
| chr10   | 46339034  | 46369034  | 2.76     | <i>AGAP4</i>                              |
| chr11   | 71898574  | 71928574  | 2.76     | <i>FOLR1, FOLR2</i>                       |
| chr20   | 39678005  | 39708005  | 2.74     | <i>TOP1</i>                               |
| chr6    | 83805815  | 83835815  | 2.71     | <i>DOPEY1</i>                             |
| * chr7  | 99258619  | 99288619  | 2.68     | <i>CYP3A5</i>                             |
| chr22   | 32476780  | 32506780  | 2.67     | <i>SLC5A1</i>                             |
| chr1    | 161546808 | 161576808 | 2.66     | <i>FCGR3A, FCGR2B</i>                     |

**Supplementary Table 2C:** SFselect positive selection signals found in Somali population. All the 30 kb window scores reported are above the 99.99 percentile threshold calculated after the simulations. Only protein coding genes are reported.

\* : Population-specific positive selection signals. These signals are above the 99.99 percentile threshold calculated after the simulations that are not found among the 99 percentile of the rest of the populations of study.

| Chr     | Start     | Stop      | SFselect | Genes                                                                 |
|---------|-----------|-----------|----------|-----------------------------------------------------------------------|
| chr11   | 71923574  | 71953574  | 5.12     | <i>FOLR2, INPPL1, PHOX2A</i>                                          |
| chr13   | 53167755  | 53197755  | 4.74     | <i>HNRNPA1L2</i>                                                      |
| chr2    | 232673695 | 232703695 | 4.13     | <i>COPS7B</i>                                                         |
| chr8    | 48786376  | 48816376  | 4.05     | <i>PRKDC</i>                                                          |
| chr17   | 15526088  | 15556088  | 4.00     | <i>RP11-385D13.1, TRIM16</i>                                          |
| chr10   | 18164034  | 18194034  | 3.93     | <i>MRC1</i>                                                           |
| chr11   | 71948574  | 71978574  | 3.93     | <i>INPPL1, PHOX2A</i>                                                 |
| chr1    | 149796808 | 149826808 | 3.85     | <i>HIST2H4A, HIST2H3C, HIST2H2AA3, HIST2H2AA4, HIST2H3A, HIST2H4B</i> |
| chr2    | 95748695  | 95778695  | 3.81     | <i>MRPS5</i>                                                          |
| chr2    | 113198695 | 113228695 | 3.72     | <i>RGPD8</i>                                                          |
| chr15   | 32754330  | 32784330  | 3.70     | <i>AC135983.2</i>                                                     |
| chr15   | 30829330  | 30859330  | 3.63     | <i>GOLGA8Q</i>                                                        |
| chr9    | 99740910  | 99770910  | 3.50     | <i>HIATL2</i>                                                         |
| chr10   | 51189034  | 51219034  | 3.46     | <i>FAM21D</i>                                                         |
| chr1    | 226096808 | 226126808 | 3.38     | <i>LEFTY1, RP4-559A3.7, PYCR2, LEFTY2</i>                             |
| chr5    | 140705629 | 140735629 | 3.31     | <i>PCDHGA1, PCDHGA2, PCDHGA3, PCDHGB1, PCDHGA4</i>                    |
| chr5    | 81280629  | 81310629  | 3.21     | <i>ATG10</i>                                                          |
| * chr1  | 115121808 | 115151808 | 3.19     | <i>BCAS2, DENND2C</i>                                                 |
| chr11   | 71898574  | 71928574  | 3.12     | <i>FOLR1, FOLR2</i>                                                   |
| * chr19 | 57907864  | 57937864  | 3.06     | <i>AC003002.4, ZNF548, AC003002.6, AC004076.7, ZNF17</i>              |
| chr2    | 155023695 | 155053695 | 3.05     | <i>GALNT13</i>                                                        |
| chr10   | 46489034  | 46519034  | 3.01     | <i>PTPN20A</i>                                                        |
| chr17   | 47876088  | 47906088  | 2.94     | <i>KAT7</i>                                                           |
| chr5    | 45355629  | 45385629  | 2.80     | <i>HCN1</i>                                                           |
| chr1    | 78321808  | 78351808  | 2.77     | <i>FAM73A</i>                                                         |
| chr16   | 70346755  | 70376755  | 2.73     | <i>DDX19B, RP11-529K1.3</i>                                           |
| chr5    | 36955629  | 36985629  | 2.71     | <i>NIPBL</i>                                                          |
| chr22   | 32476780  | 32506780  | 2.69     | <i>SLC5A1</i>                                                         |
| chr20   | 39678005  | 39708005  | 2.65     | <i>TOP1</i>                                                           |
| chr6    | 118030815 | 118060815 | 2.63     | <i>NUS1</i>                                                           |

**Supplementary Table 2D:** SFselect positive selection signals found in Wolayta population. All the 30 kb window scores reported are above the 99.99 percentile threshold calculated after the simulations. Only protein coding genes are reported.

\* : Population-specific positive selection signals. These signals are above the 99.99 percentile threshold calculated after the simulations that are not found among the 99 percentile of the rest of the populations of study.

| Chr    | Start     | Stop      | SFselect | Genes                                     |
|--------|-----------|-----------|----------|-------------------------------------------|
| chr3   | 93798294  | 93828294  | 4.86     | <i>NSUN3</i>                              |
| chr11  | 71948574  | 71978574  | 4.05     | <i>INPPL1, PHOX2A</i>                     |
| chr10  | 46489034  | 46519034  | 3.97     | <i>PTPN20A</i>                            |
| chr10  | 46539034  | 46569034  | 3.93     | <i>PTPN20A</i>                            |
| chr3   | 93598294  | 93628294  | 3.81     | <i>PROS1</i>                              |
| chr11  | 71898574  | 71928574  | 3.71     | <i>FOLR1, FOLR2</i>                       |
| * chr9 | 40790910  | 40820910  | 3.41     | <i>ZNF658</i>                             |
| chr2   | 113198695 | 113228695 | 3.38     | <i>RGPD8</i>                              |
| chr13  | 114717755 | 114747755 | 3.33     | <i>RASA3</i>                              |
| chr2   | 95748695  | 95778695  | 3.27     | <i>MRPS5</i>                              |
| chr1   | 226096808 | 226126808 | 3.22     | <i>LEFTY1, RP4-559A3.7, PYCR2, LEFTY2</i> |
| chr11  | 71923574  | 71953574  | 3.15     | <i>FOLR2, INPPL1, PHOX2A</i>              |
| chr17  | 30351088  | 30381088  | 3.03     | <i>LRRC37B</i>                            |
| chr7   | 72433619  | 72463619  | 2.96     | <i>TRIM74, AC005488.1</i>                 |
| chr19  | 53032864  | 53062864  | 2.93     | <i>ZNF808, ZNF701</i>                     |
| chr8   | 48786376  | 48816376  | 2.86     | <i>PRKDC</i>                              |
| * chr3 | 93723294  | 93753294  | 2.83     | <i>ARL13B, STX19</i>                      |
| * chr2 | 233223695 | 233253695 | 2.79     | <i>ALPP</i>                               |
| chr3   | 93748294  | 93778294  | 2.78     | <i>ARL13B, DHFRL1</i>                     |
| chr15  | 32754330  | 32784330  | 2.77     | <i>AC135983.2</i>                         |
| chr15  | 30704330  | 30734330  | 2.75     | <i>GOLGA8R</i>                            |
| chr4   | 88110998  | 88140998  | 2.68     | <i>KLHL8</i>                              |
| chr22  | 32451780  | 32481780  | 2.61     | <i>SLC5A1</i>                             |
| chr2   | 200798695 | 200828695 | 2.58     | <i>C2orf69, TYW5, C2orf47</i>             |
| * chr9 | 40865910  | 40895910  | 2.56     | <i>ZNF658</i>                             |
| chr6   | 25955815  | 25985815  | 2.56     | <i>TRIM38</i>                             |
| chr10  | 77464034  | 77494034  | 2.55     | <i>C10orf11</i>                           |
| * chr2 | 158448695 | 158478695 | 2.54     | <i>ACVR1C</i>                             |
| chr9   | 97990910  | 98020910  | 2.53     | <i>FANCC</i>                              |
| chr2   | 111373695 | 111403695 | 2.51     | <i>BUB1</i>                               |

**Supplementary Table 2E:** SFselect positive selection signals found in Gumuz population. All the 30 kb window scores reported are above the 99.99 percentile threshold calculated after the simulations. Only protein coding genes are reported.

\* : Population-specific positive selection signals. These signals are above the 99.99 percentile threshold calculated after the simulations that are not found among the 99 percentile of the rest of the populations of study.

| Chr   | Start     | End       | Amhara | Oromo | Somali | Wolayta | Gumuz | Genes                                                    | Type of gene                |
|-------|-----------|-----------|--------|-------|--------|---------|-------|----------------------------------------------------------|-----------------------------|
| chr9  | 84515910  | 84545910  | 5.34   | 5.25  | 4.67   | 5.38    | 4.97  | <i>RP11-383M4.2, RP11-383M4.6, SPATA31D4, SPATA31D5P</i> | lincRNA, lincRNA, PS, PS    |
| chr11 | 123574    | 153574    | 5.04   | 4.50  | 2.58   | 5.09    | 4.39  | <i>LINC01001, RP11-304M2.6, CICIP23, RNU6-447P</i>       | lincRNA, lincRNA, PS, snRNA |
| chr11 | 71898574  | 71928574  | 4.77   | 3.02  | 2.76   | 3.12    | 3.71  | <i>FOLR1, FOLR2</i>                                      | PC                          |
| chr19 | 50582864  | 50612864  | 4.61   | 4.67  | 5.28   | 5.26    | 5.60  | -                                                        | -                           |
| chr11 | 71948574  | 71978574  | 4.50   | 4.26  | 3.95   | 3.93    | 4.05  | <i>INPPL1, PHOX2A, AP000593.5</i>                        | PC, PC, PS                  |
| chr11 | 71923574  | 71953574  | 4.48   | 4.75  | 5.29   | 5.12    | 3.15  | <i>FOLR2, INPPL1, PHOX2A</i>                             | PC                          |
| chr1  | 226096808 | 226126808 | 3.85   | 4.12  | 3.01   | 3.38    | 3.22  | <i>LEFTY1, LEFTY2, PYCR2</i>                             | PC                          |
| chr5  | 81280629  | 81310629  | 3.84   | 3.10  | 2.89   | 3.21    | 2.40  | <i>ATG10, PPIAP11</i>                                    | PC, PS                      |
| chr15 | 32754330  | 32784330  | 3.63   | 2.76  | 2.66   | 3.70    | 2.77  | <i>AC135983.2, RP11-632K20.6</i>                         | PC, PS                      |
| chr3  | 93598294  | 93628294  | 3.01   | 2.47  | 3.26   | 2.54    | 3.81  | <i>PROS1</i>                                             | PC                          |
| chr2  | 96448695  | 96478695  | 2.94   | 3.14  | 2.77   | 2.95    | 2.93  | <i>LINC00342, AC008268.2</i>                             | lincRNA, PS                 |
| chr1  | 571808    | 601808    | 2.78   | 3.00  | 2.62   | 2.99    | 2.85  | <i>RP5-857K21.4</i>                                      | lincRNA                     |
| chr20 | 39678005  | 39708005  | 2.59   | 2.49  | 2.74   | 2.65    | 2.51  | <i>TOP1</i>                                              | PC                          |
| chr15 | 30704330  | 30734330  | 2.52   | 2.62  | 2.38   | 2.45    | 2.75  | <i>GOLGA8R, RP11-382B18.5</i>                            | PC, PS                      |
| chr4  | 89360998  | 89390998  | 2.42   | 2.40  | 2.38   | 2.43    | 2.44  | <i>HERC5, HERC6</i>                                      | PC                          |
| chr1  | 184021808 | 184051808 | 2.41   | 2.32  | 2.34   | 2.33    | 2.32  | <i>TSEN15</i>                                            | PC                          |

**Supplementary Table 3:** SFselect positive selection signals shared among the five populations of study. All the reported SFselect scores of the 30 kb windows are above the 99.99 percentile threshold calculated after the simulations. We also report the genes within the window and the type of gene (PC: protein coding gene, PS: pseudogene, lincRNA: long interspersed non-coding RNA, small nuclear RNA: snRNA).

| Chr   | Start    | End      | Amhara |       | Oromo |       | Somali |       | Wolayta |       | Gumuz |       | Genes                                                       | Type of gene |
|-------|----------|----------|--------|-------|-------|-------|--------|-------|---------|-------|-------|-------|-------------------------------------------------------------|--------------|
|       |          |          | mean   | maxP  | mean  | maxP  | mean   | maxP  | mean    | maxP  | mean  | maxP  |                                                             |              |
| chr16 | 21746755 | 21776755 | 3.12   | 6.59  | 2.85  | 7.32  | 2.82   | 5.50  | 2.32    | 6.02  | 3.20  | 7.05  | <i>OTOA</i>                                                 | PC           |
| chr8  | 36136376 | 36166376 | 3.09   | 8.28  | 2.88  | 5.62  | 2.42   | 5.16  | 3.17    | 6.46  | 2.29  | 3.98  | <i>MTND6P19, RP11-139F9.1, RP11-593P24.2, RP11-593P24.3</i> | PS           |
| chr16 | 32296755 | 32326755 | 2.97   | 6.71  | 2.98  | 5.29  | 3.52   | 6.31  | 3.05    | 5.61  | 3.56  | 8.45  | <i>RP11-17M15.2</i>                                         | PS           |
| chr16 | 33496755 | 33526755 | 2.54   | 4.87  | 2.53  | 5.34  | 2.88   | 5.11  | 2.46    | 4.70  | 2.06  | 5.21  | <i>BMS1P8</i>                                               | PS           |
| chr7  | 65258619 | 65288619 | 2.45   | 5.09  | 2.66  | 7.49  | 2.13   | 5.39  | 2.66    | 6.28  | 2.74  | 5.27  | <i>RNU6-912P, RP11-479O9.2</i>                              | snRNA,<br>PS |
| chr16 | 32121755 | 32151755 | 2.35   | 2.88  | 2.53  | 5.37  | 2.08   | 3.06  | 2.62    | 3.38  | 2.89  | 3.67  | <i>HERC2P4, RP11-1166P10.7</i>                              | PS           |
| chr16 | 32321755 | 32351755 | 2.29   | 6.71  | 2.06  | 5.29  | 2.29   | 6.12  | 2.19    | 5.61  | 2.05  | 5.61  | <i>RP11-17M15.2</i>                                         | PS           |
| chr4  | 510998   | 540998   | 2.24   | 5.67  | 2.30  | 3.71  | 2.68   | 6.25  | 2.12    | 3.54  | 2.35  | 4.53  | <i>PIGG</i>                                                 | PC           |
| chr2  | 398695   | 428695   | 2.14   | 11.89 | 2.95  | 12.85 | 2.55   | 12.36 | 2.36    | 11.78 | 2.45  | 15.05 | <i>AC105393.1, AC105393.2</i>                               | lincRNA      |
| chr16 | 31996755 | 32026755 | 1.95   | 2.23  | 2.61  | 2.59  | 2.25   | 3.08  | 2.37    | 3.01  | 3.37  | 4.47  | <i>RP11-1166P10.1, RP11-1166P10.6</i>                       | PS           |

**Supplementary Table 4:** iHS positive selection signals shared among the five populations of study. For each population the mean iHS score for the 30 kb windows is reported and the highest  $-\log(p\text{-value})$  of a variant within the window. The windows were selected for comparison if their mean iHS score was above the 99.99 percentile threshold in at least one population and in the 99.9 threshold in the rest. In gray, the only shared window that is in all populations with mean iHS scores above the 99.99 threshold. We also report the genes within the window and the type of gene (PC: protein coding gene, PS: pseudogene, lincRNA: long interspersed non-coding RNA, small nuclear RNA: snRNA).



| Chr   | Start     | Stop      | mean <i>iHS</i> | maxP | Genes           |                    |
|-------|-----------|-----------|-----------------|------|-----------------|--------------------|
| chr18 | 6247301   | 6277301   | 4.14            | 4.67 | <i>L3MBTL4</i>  |                    |
| chr1  | 202396808 | 202426808 | 3.57            | 6.71 | <i>PPP1R12B</i> |                    |
| chr18 | 66647301  | 66677301  | 3.34            | 6.67 | <i>CCDC102B</i> |                    |
| chr16 | 21746755  | 21776755  | 3.12            | 6.58 | <i>OTOA</i>     |                    |
| chr9  | 74490910  | 74520910  | 3.05            | 4.08 | <i>ABHD17B</i>  |                    |
| chr1  | 244721808 | 244751808 | 2.99            | 5.66 | <i>C1orf101</i> |                    |
| chr18 | 66722301  | 66752301  | 2.98            | 8.46 | <i>CCDC102B</i> |                    |
| chr1  | 244696808 | 244726808 | 2.96            | 5.73 | <i>C1orf101</i> |                    |
| chr6  | 128505815 | 128535815 | 2.92            | 4.82 | <i>PTPRK</i>    |                    |
| chr11 | 85173574  | 85203574  | 2.92            | 5.16 | <i>DLG2</i>     |                    |
| chr12 | 22524817  | 22554817  | 2.89            | 9.50 | <i>ST8SIA1</i>  |                    |
| chr12 | 113674817 | 113704817 | 2.86            | 5.59 | <i>TPCN1</i>    |                    |
| chr1  | 244671808 | 244701808 | 2.77            | 5.18 | <i>C1orf101</i> |                    |
| chr6  | 157480815 | 157510815 | 2.73            | 4.75 | <i>ARID1B</i>   |                    |
| *     | chr6      | 136905815 | 136935815       | 2.71 | 6.33            | <i>MAP3K5</i>      |
|       | chr2      | 158323695 | 158353695       | 2.71 | 4.83            | <i>CYTIP</i>       |
|       | chr12     | 113699817 | 113729817       | 2.68 | 4.06            | <i>TPCN1</i>       |
|       | chr11     | 75573574  | 75603574        | 2.66 | 4.31            | <i>UVRAG</i>       |
| *     | chr4      | 47210998  | 47240998        | 2.63 | 4.79            | <i>GABRB1</i>      |
|       | chr22     | 46701780  | 46731780        | 2.58 | 4.62            | <i>GTSE1, TRMU</i> |
|       | chr9      | 40815910  | 40845910        | 2.54 | 5.23            | <i>ZNF658</i>      |
|       | chr11     | 85198574  | 85228574        | 2.53 | 4.76            | <i>DLG2</i>        |

**Supplementary Table 5A:** *iHS* positive selection signals found in Amhara population. The mean *iHS* score for the 30 kb windows is reported and the highest  $-\log(p\text{-value})$  of a variant within the window. All the reported *iHS* scores are above the reported 99.99 percentile thresholds calculated after the simulations. Only protein coding genes are reported.

\* : Population-specific positive selection signals. These signals are above the 99.99 percentile threshold calculated after the simulations that are not found among the 99 percentile of the rest of the populations of study.

| Chr    | Start     | Stop      | mean <i>iHS</i> | max <i>P</i> | Genes                                     |
|--------|-----------|-----------|-----------------|--------------|-------------------------------------------|
| chr3   | 19248294  | 19278294  | 3.33            | 7.46         | <i>KCNH8</i>                              |
| chr1   | 202396808 | 202426808 | 3.14            | 6.77         | <i>PPP1R12B</i>                           |
| chr17  | 79776088  | 79806088  | 3.08            | 4.25         | <i>FAM195B, AC174470.1, PPP1R27, P4HB</i> |
| chr2   | 237448695 | 237478695 | 3.07            | 5.37         | <i>ACKR3</i>                              |
| chr12  | 8299817   | 8329817   | 2.96            | 2.77         | <i>ZNF705A</i>                            |
| chr11  | 72023574  | 72053574  | 2.94            | 6.60         | <i>CLPB</i>                               |
| chr3   | 19298294  | 19328294  | 2.91            | 4.79         | <i>KCNH8</i>                              |
| chr2   | 158323695 | 158353695 | 2.87            | 6.16         | <i>CYTIP</i>                              |
| chr11  | 72048574  | 72078574  | 2.86            | 4.86         | <i>CLPB</i>                               |
| chr16  | 21746755  | 21776755  | 2.85            | 7.32         | <i>OTOA</i>                               |
| chr12  | 82849817  | 82879817  | 2.82            | 7.11         | <i>METTL25</i>                            |
| chr17  | 44351088  | 44381088  | 2.72            | 8.42         | <i>ARL17B, LRRC37A</i>                    |
| chr3   | 19273294  | 19303294  | 2.69            | 4.79         | <i>KCNH8</i>                              |
| chr11  | 75473574  | 75503574  | 2.60            | 3.09         | <i>DGAT2</i>                              |
| chr11  | 75523574  | 75553574  | 2.60            | 7.06         | <i>UVRAG</i>                              |
| chr3   | 19173294  | 19203294  | 2.59            | 5.31         | <i>KCNH8</i>                              |
| chr12  | 45674817  | 45704817  | 2.58            | 3.82         | <i>ANO6</i>                               |
| chr12  | 113674817 | 113704817 | 2.56            | 3.62         | <i>TPCN1</i>                              |
| chr1   | 149821808 | 149851808 | 2.55            | 3.95         | <i>HIST2H2AA4, HIST2H3A, HIST2H4B</i>     |
| chr12  | 64224817  | 64254817  | 2.55            | 5.39         | <i>SRGAP1</i>                             |
| chr10  | 70414034  | 70444034  | 2.54            | 4.44         | <i>TET1</i>                               |
| * chr3 | 164673294 | 164703294 | 2.54            | 4.79         | <i>SI</i>                                 |
| chr15  | 44879330  | 44909330  | 2.54            | 4.07         | <i>SPG11</i>                              |
| chr12  | 82799817  | 82829817  | 2.54            | 5.21         | <i>METTL25</i>                            |

**Supplementary Table 5B:** *iHS* positive selection signals found in Oromo population. The mean *iHS* score for the 30 kb windows is reported and the highest  $-\log(p\text{-value})$  of a variant within the window. All the reported *iHS* scores are above the reported 99.99 percentile thresholds calculated after the simulations. Only protein coding genes are reported.

\* : Population-specific positive selection signals. These signals are above the 99.99 percentile threshold calculated after the simulations that are not found among the 99 percentile of the rest of the populations of study.

| Chr   | Start     | Stop      | meanIHS   | maxP | Genes               |                                                    |
|-------|-----------|-----------|-----------|------|---------------------|----------------------------------------------------|
| chr11 | 75448574  | 75478574  | 3.52      | 7.94 | <i>DGAT2</i>        |                                                    |
| chr11 | 75523574  | 75553574  | 3.40      | 8.77 | <i>UVRAG</i>        |                                                    |
| chr2  | 136248695 | 136278695 | 3.32      | 5.99 | <i>ZRANB3</i>       |                                                    |
| chr11 | 75498574  | 75528574  | 3.22      | 6.24 | <i>DGAT2, UVRAG</i> |                                                    |
| chr21 | 30808956  | 30838956  | 3.17      | 5.72 | <i>BACH1</i>        |                                                    |
| chr1  | 51596808  | 51626808  | 3.13      | 3.72 | <i>C1orf185</i>     |                                                    |
| chr1  | 70471808  | 70501808  | 3.12      | 6.91 | <i>LRRC7</i>        |                                                    |
| chr2  | 135973695 | 136003695 | 3.10      | 5.40 | <i>ZRANB3</i>       |                                                    |
| chr11 | 75548574  | 75578574  | 3.04      | 7.65 | <i>UVRAG</i>        |                                                    |
| *     | chr2      | 136273695 | 136303695 | 2.98 | 6.50                | <i>ZRANB3, R3HDM1</i>                              |
|       | chr11     | 75723574  | 75753574  | 2.96 | 3.80                | <i>UVRAG</i>                                       |
|       | chr2      | 136073695 | 136103695 | 2.94 | 5.07                | <i>ZRANB3</i>                                      |
| *     | chr9      | 28615910  | 28645910  | 2.94 | 5.38                | <i>LINGO2</i>                                      |
| *     | chr9      | 28640910  | 28670910  | 2.94 | 5.08                | <i>LINGO2</i>                                      |
|       | chr2      | 237448695 | 237478695 | 2.92 | 4.86                | <i>ACKR3</i>                                       |
|       | chr2      | 136023695 | 136053695 | 2.91 | 4.86                | <i>ZRANB3</i>                                      |
| *     | chr19     | 3232864   | 3262864   | 2.88 | 6.38                | <i>CELF5</i>                                       |
| *     | chr15     | 42654330  | 42684330  | 2.86 | 5.87                | <i>CAPN3</i>                                       |
|       | chr12     | 44674817  | 44704817  | 2.85 | 6.04                | <i>TMEM117</i>                                     |
|       | chr9      | 40815910  | 40845910  | 2.85 | 5.65                | <i>ZNF658</i>                                      |
|       | chr11     | 75473574  | 75503574  | 2.83 | 3.54                | <i>DGAT2</i>                                       |
|       | chr1      | 51696808  | 51726808  | 2.83 | 4.72                | <i>RNF11</i>                                       |
|       | chr16     | 21746755  | 21776755  | 2.82 | 5.50                | <i>OTOA</i>                                        |
|       | chr12     | 56724817  | 56754817  | 2.82 | 3.85                | <i>PAN2, IL23A, STAT2, APOF</i>                    |
|       | chr2      | 136123695 | 136153695 | 2.82 | 5.74                | <i>ZRANB3</i>                                      |
|       | chr4      | 71635998  | 71665998  | 2.80 | 5.71                | <i>RUFY3</i>                                       |
|       | chr17     | 58826088  | 58856088  | 2.75 | 4.69                | <i>BCAS3</i>                                       |
|       | chr4      | 71610998  | 71640998  | 2.75 | 6.67                | <i>RUFY3</i>                                       |
|       | chr2      | 135998695 | 136028695 | 2.73 | 5.40                | <i>ZRANB3</i>                                      |
| *     | chr10     | 57364034  | 57394034  | 2.72 | 2.85                | <i>PCDH15</i>                                      |
|       | chr2      | 136098695 | 136128695 | 2.72 | 4.33                | <i>ZRANB3</i>                                      |
|       | chr7      | 137258619 | 137288619 | 2.71 | 6.41                | <i>DGKI</i>                                        |
|       | chr4      | 510998    | 540998    | 2.68 | 6.25                | <i>PIGG</i>                                        |
|       | chr9      | 74490910  | 74520910  | 2.68 | 3.93                | <i>ABHD17B</i>                                     |
| *     | chr2      | 135823695 | 135853695 | 2.67 | 3.93                | <i>RAB3GAP1</i>                                    |
|       | chr9      | 74515910  | 74545910  | 2.66 | 4.85                | <i>ABHD17B, C9orf85</i>                            |
|       | chr12     | 45799817  | 45829817  | 2.66 | 5.86                | <i>ANO6</i>                                        |
|       | chr1      | 51571808  | 51601808  | 2.65 | 4.53                | <i>C1orf185</i>                                    |
| *     | chr13     | 52942755  | 52972755  | 2.63 | 2.27                | <i>THSD1</i>                                       |
|       | chr7      | 123658619 | 123688619 | 2.63 | 7.45                | <i>TMEM229A</i>                                    |
|       | chr8      | 145211376 | 145241376 | 2.62 | 5.91                | <i>MROH1</i>                                       |
| *     | chr1      | 225646808 | 225676808 | 2.61 | 4.72                | <i>ENAH</i>                                        |
|       | chr2      | 136148695 | 136178695 | 2.59 | 4.94                | <i>ZRANB3</i>                                      |
| *     | chr2      | 135773695 | 135803695 | 2.57 | 4.89                | <i>MAP3K19</i>                                     |
|       | chr12     | 11174817  | 11204817  | 2.57 | 5.91                | <i>PRR4, TAS2R14, TAS2R19, TAS2R31, AC018630.1</i> |
|       | chr4      | 159235998 | 159265998 | 2.56 | 5.33                | <i>RXFP1</i>                                       |
|       | chr8      | 145161376 | 145191376 | 2.55 | 7.43                | <i>SHARPIN, MAF1, KIAA1875</i>                     |
|       | chr11     | 75573574  | 75603574  | 2.54 | 5.48                | <i>UVRAG</i>                                       |
|       | chr7      | 137233619 | 137263619 | 2.53 | 6.41                | <i>DGKI</i>                                        |
|       | chr7      | 74558619  | 74588619  | 2.53 | 3.73                | <i>GTF2IRD2B</i>                                   |

**Supplementary Table 5C:** iHS positive selection signals found in Somali population. The mean iHS score for the 30 kb windows is reported and the highest  $-\log(p\text{-value})$  of a variant within the window. All the reported iHS scores are above the reported 99.99 percentile thresholds calculated after the simulations. Only protein coding genes are reported.

\* : Population-specific positive selection signals. These signals are above the 99.99 percentile threshold calculated after the simulations that are not found among the 99 percentile of the rest of the populations of study.

| Chr   | Start     | Stop      | meanIHS   | maxP | Genes                                 |                                      |
|-------|-----------|-----------|-----------|------|---------------------------------------|--------------------------------------|
| chr1  | 202396808 | 202426808 | 3.59      | 6.66 | <i>PPP1R12B</i>                       |                                      |
| chr18 | 66647301  | 66677301  | 3.41      | 6.40 | <i>CCDC102B</i>                       |                                      |
| chr17 | 44351088  | 44381088  | 3.20      | 9.36 | <i>ARL17B, LRRC37A</i>                |                                      |
| chr19 | 39757864  | 39787864  | 3.14      | 5.36 | <i>IFNL2, IFNL1</i>                   |                                      |
| chr18 | 66722301  | 66752301  | 3.09      | 7.24 | <i>CCDC102B</i>                       |                                      |
| chr1  | 149821808 | 149851808 | 3.03      | 5.01 | <i>HIST2H2AAA, HIST2H3A, HIST2H4B</i> |                                      |
| chr12 | 82849817  | 82879817  | 2.98      | 6.06 | <i>METTL25</i>                        |                                      |
| chr17 | 30276088  | 30306088  | 2.82      | 4.76 | <i>SUZ12</i>                          |                                      |
| *     | chr11     | 71823574  | 71853574  | 2.82 | 2.76                                  | <i>ANAPC15, FOLR3</i>                |
|       | chr17     | 63001088  | 63031088  | 2.82 | 6.13                                  | <i>GNA13</i>                         |
|       | chr8      | 145211376 | 145241376 | 2.81 | 6.46                                  | <i>MROH1</i>                         |
|       | chr17     | 44326088  | 44356088  | 2.81 | 9.36                                  | <i>ARL17B</i>                        |
|       | chr9      | 16565910  | 16595910  | 2.79 | 6.40                                  | <i>BNC2</i>                          |
|       | chr5      | 144980629 | 145010629 | 2.74 | 5.92                                  | <i>PRELID2</i>                       |
|       | chr8      | 124261376 | 124291376 | 2.73 | 5.69                                  | <i>ZHX1-C8ORF76, ZHX1</i>            |
|       | chr18     | 66672301  | 66702301  | 2.72 | 5.42                                  | <i>CCDC102B</i>                      |
|       | chr17     | 62501088  | 62531088  | 2.72 | 2.92                                  | <i>DDX5, CEP95</i>                   |
|       | chr12     | 22824817  | 22854817  | 2.69 | 4.37                                  | <i>ETNK1</i>                         |
|       | chr8      | 124211376 | 124241376 | 2.68 | 4.99                                  | <i>FAM83A, C8orf76, ZHX1-C8ORF76</i> |
|       | chr2      | 173473695 | 173503695 | 2.65 | 4.94                                  | <i>PDK1</i>                          |
|       | chr1      | 51571808  | 51601808  | 2.63 | 4.00                                  | <i>C1orf185</i>                      |
|       | chr20     | 20678005  | 20708005  | 2.62 | 4.46                                  | <i>RALGAPA2</i>                      |
|       | chr20     | 20653005  | 20683005  | 2.62 | 3.97                                  | <i>RALGAPA2</i>                      |
|       | chr17     | 74751088  | 74781088  | 2.60 | 4.32                                  | <i>MFSD11</i>                        |
|       | chr8      | 124236376 | 124266376 | 2.60 | 4.61                                  | <i>C8orf76, ZHX1-C8ORF76, ZHX1</i>   |
| *     | chr16     | 85621755  | 85651755  | 2.58 | 7.75                                  | <i>GSE1</i>                          |
| *     | chr10     | 45789034  | 45819034  | 2.58 | 3.33                                  | <i>OR13A1</i>                        |
|       | chr1      | 51696808  | 51726808  | 2.57 | 4.10                                  | <i>RNF11</i>                         |
|       | chr3      | 19298294  | 19328294  | 2.56 | 5.36                                  | <i>KCNH8</i>                         |
|       | chr12     | 86999817  | 87029817  | 2.56 | 6.20                                  | <i>MGAT4C</i>                        |
|       | chr3      | 19248294  | 19278294  | 2.54 | 4.84                                  | <i>KCNH8</i>                         |

**Supplementary Table 5D:** iHS positive selection signals found in Wolayta population. The mean iHS score for the 30 kb windows is reported and the highest  $-\log(p\text{-value})$  of a variant within the window. All the reported iHS scores are above the reported 99.99 percentile thresholds calculated after the simulations. Only protein coding genes are reported.

\* : Population-specific positive selection signals. These signals are above the 99.99 percentile threshold calculated after the simulations that are not found among the 99 percentile of the rest of the populations of study.

|   | Chr   | Start     | Stop      | mean <i>i</i> HS | maxP | Genes                          |
|---|-------|-----------|-----------|------------------|------|--------------------------------|
| * | chr10 | 102014034 | 102044034 | 3.74             | 5.78 | <i>CWF19L1, BLOC1S2</i>        |
| * | chr10 | 101939034 | 101969034 | 3.45             | 5.57 | <i>ERLIN1, CHUK</i>            |
| * | chr10 | 101964034 | 101994034 | 3.37             | 9.85 | <i>CHUK, CWF19L1</i>           |
|   | chr1  | 202396808 | 202426808 | 3.33             | 5.98 | <i>PPP1R12B</i>                |
|   | chr20 | 20528005  | 20558005  | 3.31             | 7.06 | <i>RALGAPA2</i>                |
|   | chr16 | 21746755  | 21776755  | 3.20             | 7.05 | <i>OTOA</i>                    |
| * | chr10 | 101989034 | 102019034 | 3.16             | 6.87 | <i>CHUK, CWF19L1</i>           |
| * | chr6  | 128080815 | 128110815 | 3.14             | 6.05 | <i>THEMIS</i>                  |
| * | chr10 | 101914034 | 101944034 | 3.11             | 6.23 | <i>ERLIN1</i>                  |
| * | chr7  | 12258619  | 12288619  | 3.05             | 7.44 | <i>TMEM106B</i>                |
|   | chr8  | 145161376 | 145191376 | 3.05             | 8.95 | <i>SHARPIN, MAF1, KIAA1875</i> |
|   | chr12 | 113849817 | 113879817 | 3.05             | 5.31 | <i>SDS, SDSL</i>               |
| * | chr6  | 128005815 | 128035815 | 3.00             | 5.00 | <i>THEMIS</i>                  |
|   | chr12 | 113824817 | 113854817 | 2.92             | 7.44 | <i>PLBD2, SDS</i>              |
| * | chr4  | 130010998 | 130040998 | 2.89             | 5.75 | <i>SCLT1, C4orf33</i>          |
|   | chr9  | 16565910  | 16595910  | 2.86             | 7.70 | <i>BNC2</i>                    |
| * | chr6  | 154330815 | 154360815 | 2.79             | 5.43 | <i>OPRM1</i>                   |
|   | chr2  | 229773695 | 229803695 | 2.75             | 6.00 | <i>PID1</i>                    |
| * | chr16 | 23096755  | 23126755  | 2.75             | 5.04 | <i>USP31</i>                   |
| * | chr16 | 23071755  | 23101755  | 2.73             | 5.11 | <i>USP31</i>                   |
|   | chr7  | 120983619 | 121013619 | 2.72             | 3.66 | <i>FAM3C</i>                   |
|   | chr6  | 128105815 | 128135815 | 2.70             | 6.05 | <i>THEMIS</i>                  |
|   | chr16 | 32046755  | 32076755  | 2.69             | 3.77 | <i>AC142381.1</i>              |
|   | chr2  | 98848695  | 98878695  | 2.69             | 4.35 | <i>VWA3B</i>                   |
| * | chr6  | 128055815 | 128085815 | 2.68             | 4.27 | <i>THEMIS</i>                  |
|   | chr7  | 74558619  | 74588619  | 2.68             | 3.41 | <i>GTF2IRD2B</i>               |
|   | chr8  | 145236376 | 145266376 | 2.67             | 4.31 | <i>MROH1</i>                   |
| * | chr7  | 65883619  | 65913619  | 2.67             | 4.09 | <i>TPST1</i>                   |
| * | chr6  | 154305815 | 154335815 | 2.67             | 5.17 | <i>OPRM1</i>                   |
| * | chr16 | 23121755  | 23151755  | 2.64             | 5.03 | <i>USP31</i>                   |
|   | chr2  | 98823695  | 98853695  | 2.63             | 4.54 | <i>VWA3B</i>                   |
| * | chr7  | 133983619 | 134013619 | 2.62             | 5.29 | <i>SLC35B4</i>                 |
|   | chr11 | 16048574  | 16078574  | 2.61             | 5.27 | <i>SOX6</i>                    |
| * | chr10 | 102039034 | 102069034 | 2.58             | 8.06 | <i>BLOC1S2, PKD2L1</i>         |
| * | chr6  | 33030815  | 33060815  | 2.56             | 6.90 | <i>HLA-DPA1, HLA-DPB1</i>      |
|   | chr7  | 121008619 | 121038619 | 2.56             | 3.66 | <i>FAM3C</i>                   |
| * | chr4  | 41985998  | 42015998  | 2.55             | 4.93 | <i>DCAF4L1, SLC30A9</i>        |

**Supplementary Table 5E:** *i*HS positive selection signals found in Gumuz population. The mean *i*HS score for the 30 kb windows is reported and the highest  $-\log(p\text{-value})$  of a variant within the window. All the reported *i*HS scores are above the reported 99.99 percentile thresholds calculated after the simulations. Only protein coding genes are reported.

\* : Population-specific positive selection signals. These signals are above the 99.99 percentile threshold calculated after the simulations that are not found among the 99 percentile of the rest of the populations of study.
